# Supplementary material
Source: PubMed Central journal article supplement (PMC6788964)
Supplement: NIHMS1529222-supplement-2.pdf [file NIHMS1529222-supplement-2.pdf]

## Diminished Fear Extinction in Adolescents Is Associated With an Altered Somatostatin Interneuron-Mediated Inhibition in the Infralimbic Cortex

### Supplemental Information

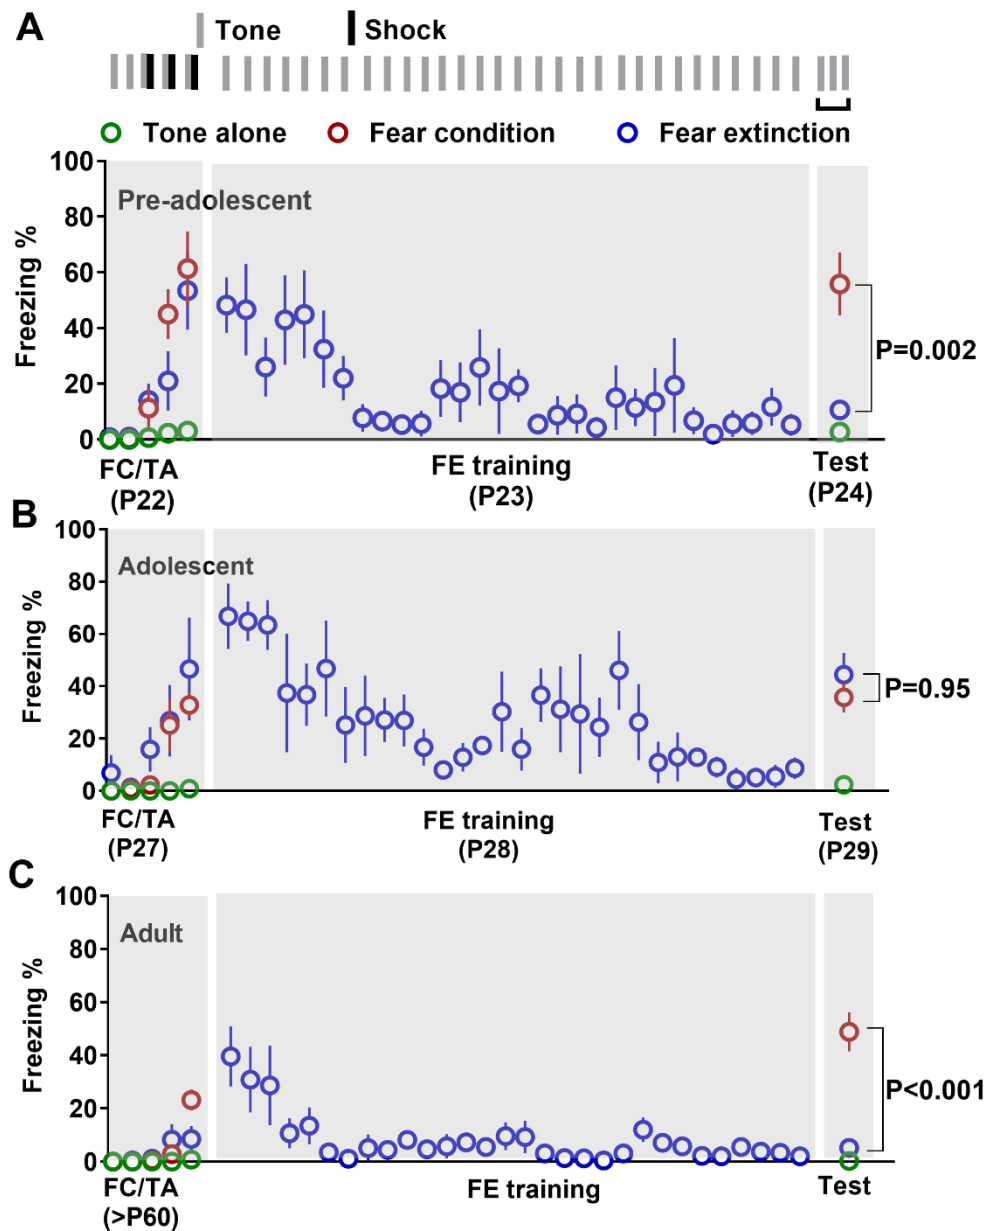

**Figure S1.** Suppression of fear extinction during adolescence in PV-ChR2 mice. Average freezing in tone alone (TA), fear conditioning (FC) and fear extinction (FE) groups [A. pre-adolescent: tone alone (5 mice), fear conditioning (5 mice), and fear extinction (5 mice),

comparison of freezing on day 3:  $F(2, 12) = 16.7, p < 0.001$ ], [**B.** adolescent: tone alone (5 mice), fear conditioning (5 mice), and fear extinction (4 mice), comparison of freezing on day 3:  $F(2, 11) = 16.1, p < 0.001$ ], and [**C.** adult: tone alone (4 mice), fear conditioning (4 mice), and fear extinction (4 mice), comparison of freezing on day 3:  $F(2, 9) = 35.7, p < 0.001$ ] on days 1 (tone alone or fear conditioning), 2 (extinction training) and 3 (memory test).

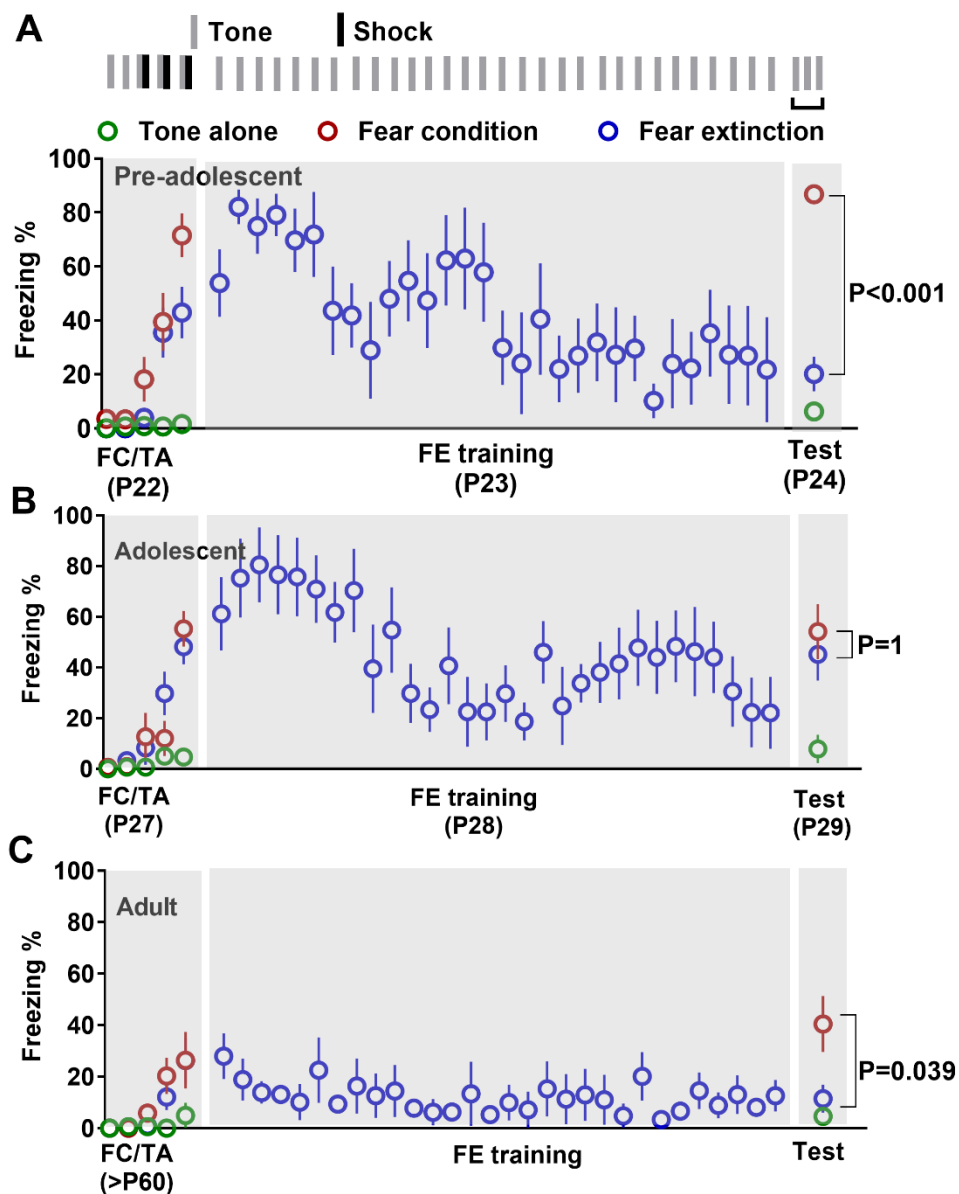

**Figure S2.** Suppression of fear extinction during adolescence in SST-ChR2 mice. Average freezing in tone alone (TA), fear conditioning (FC) and fear extinction (FE) groups [A. pre-adolescent: tone alone (5 mice), fear conditioning (5 mice), and fear extinction (5 mice), comparison of freezing on day 3:  $F(2, 12) = 88.5$ ,  $p < 0.001$ ], [B. adolescent: tone alone (6 mice), fear conditioning (5 mice), and fear extinction (6 mice), comparison of freezing on day 3:  $F(2, 14) = 7.4$ ,  $p = 0.006$ ], and [C. adult: tone alone (6 mice), fear conditioning (5 mice), and fear extinction (5 mice), comparison of freezing on day 3:  $F(2, 13) = 7.45$ ,  $p = 0.007$ ] on days 1 (tone alone or fear conditioning), 2 (extinction training) and 3 (memory test).
